# Supplementary material for: Comprehensive Evaluation of the Efficiency of Yeast Cell Wall Extract to Adsorb Ochratoxin A and Mitigate Accumulation of the Toxin in Broiler Chickens
Source: Toxins (Basel). 2020 Jan 7;12(1):37. doi: 10.3390/toxins12010037 (PMC7020489; doi:10.3390/toxins12010037)
Supplement: Supplementary file 1 [file toxins-12-00037-s001.pdf]

# Supplementary Materials: Comprehensive Evaluation of the Efficiency of Yeast Cell Wall Extract to Adsorb Ochratoxin A and Mitigate Accumulation of the Toxin in Broiler Chickens

Suvi Vartiainen \*, Alex Yiannikouris, Juha Apajalahti and Colm A. Moran

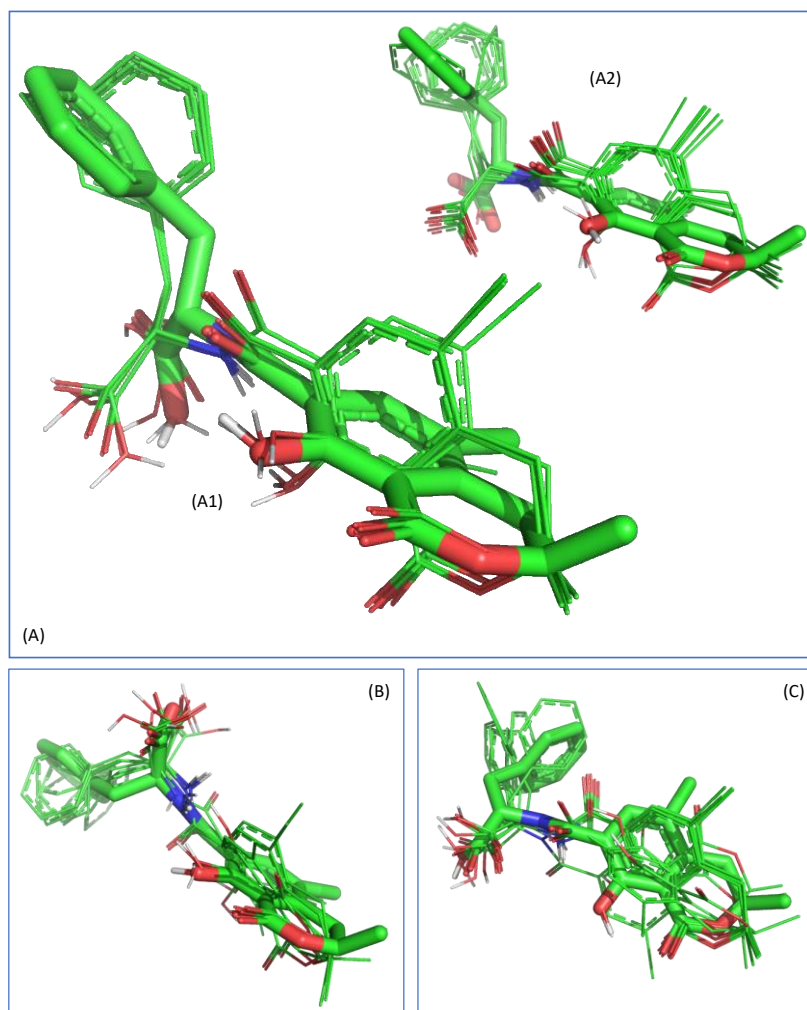

**Figure S1.** Computer generated views of the aligned energy-minimized 9 states of ochratoxin A (OTA) docking into  $\beta$ -(1,3)-D-glucans chain alone (A) with A1 corresponding to OTA with no charge (corresponding to charge state at pH 3.0) and A2 with a partial charge equal to  $-1$  (corresponding to charge state at pH 6.5); into  $\beta$ -(1,3)-D-glucans branched with  $\beta$ -(1,6)-D-glucans conformation 1 (B); and conformation 2 (C). In these views, only the OTA is represented to account for conformational changes of the ligand molecule.

**Table S1.** Energy values describing the affinity of interaction between ochratoxin A (OTA) and 3 different  $\beta$ -D-glucans conformations found in yeast cell wall extract.

| Receptor Conformation                                                                              | Mode | Binding Affinity of<br>OTA (OTA-) | Distance from Best Mode for<br>OTA (OTA-) |                     |
|----------------------------------------------------------------------------------------------------|------|-----------------------------------|-------------------------------------------|---------------------|
|                                                                                                    |      | (kcal/mol)                        | RMSD Lower<br>Bound                       | RMSD Upper<br>Bound |
| $\beta$ -(1,3)-D-glucans                                                                           | 1    | -7.8 (-7.8)                       | 0.000                                     | 0.000               |
|                                                                                                    | 2    | -7.8 (-7.6)                       | 16.518 (6.029)                            | 17.354 (8.254)      |
|                                                                                                    | 3    | -7.5 (-7.6)                       | 8.058 (15.256)                            | 8.455 (16.367)      |
|                                                                                                    | 4    | -7.5 (-7.6)                       | 8.370 (8.467)                             | 12.131 (12.118)     |
|                                                                                                    | 5    | -7.5 (-7.4)                       | 4.243 (17.300)                            | 6.818 (19.875)      |
|                                                                                                    | 6    | -7.5 (-7.3)                       | 8.772 (2.910)                             | 10.082 (8.297)      |
|                                                                                                    | 7    | -7.4 (-7.1)                       | 2.709 (8.144)                             | 8.284 (8.559)       |
|                                                                                                    | 8    | -7.4 (-7.0)                       | 3.053 (9.230)                             | 8.398 (10.822)      |
|                                                                                                    | 9    | -7.3 (-7.0)                       | 16.183 (16.779)                           | 18.375 (18.898)     |
| $\beta$ -(1,3)-D-glucans branched<br>with 3 $\times$<br>$\beta$ -(1,6)-D-glucans<br>conformation 1 | 1    | -7.6                              | 0.000                                     | 0.000               |
|                                                                                                    | 2    | -7.6                              | 4.809                                     | 9.094               |
|                                                                                                    | 3    | -7.6                              | 4.352                                     | 6.870               |
|                                                                                                    | 4    | -7.4                              | 3.307                                     | 6.662               |
|                                                                                                    | 5    | -7.3                              | 5.152                                     | 6.959               |
|                                                                                                    | 6    | -7.0                              | 4.429                                     | 6.875               |
|                                                                                                    | 7    | -7.0                              | 7.265                                     | 9.729               |
|                                                                                                    | 8    | -7.0                              | 4.595                                     | 10.080              |
|                                                                                                    | 9    | -6.9                              | 7.126                                     | 9.398               |
| $\beta$ -(1,3)-D-glucans branched<br>with 3 $\times$<br>$\beta$ -(1,6)-D-glucans<br>conformation 2 | 1    | -7.4                              | 0.000                                     | 0.000               |
|                                                                                                    | 2    | -7.3                              | 6.473                                     | 10.175              |
|                                                                                                    | 3    | -7.1                              | 4.922                                     | 8.050               |
|                                                                                                    | 4    | -7.1                              | 7.098                                     | 10.478              |
|                                                                                                    | 5    | -7.1                              | 4.183                                     | 7.712               |
|                                                                                                    | 6    | -7.1                              | 5.568                                     | 9.246               |
|                                                                                                    | 7    | -7.1                              | 4.093                                     | 7.994               |
|                                                                                                    | 8    | -7.0                              | 11.527                                    | 14.842              |
|                                                                                                    | 9    | -7.0                              | 3.685                                     | 6.188               |

Root mean square deviation (RMSD) values measuring the average distance between atoms of a position relative to the best fitting position, are calculated using only movable heavy atoms. Two variants of RMSD metrics are provided, rmsd/lb (RMSD lower bound) and rmsd/ub (RMSD upper bound), differing in how the atoms are matched in the distance calculation: rmsd/ub matches each atom in one conformation with itself in the other conformation, ignoring any symmetry. rmsd' matches each atom in one conformation with the closest atom of the same element type in the other conformation rmsd/lb is defined as follows:  $\text{rmsd/lb}(c1, c2) = \max(\text{rmsd}'(c1, c2), \text{rmsd}'(c2, c1))$ , with cn conformation n.
